# Supplementary material for: A microwave-activated coal fly ash catalyst for the oxidative elimination of organic pollutants in a Fenton-like process
Source: Royal Society of Chemistry journal article supplement (doi:10.1039/c9ra00875f), 2019-01-01
Supplement: c9ra00875f1.pdf [file c9ra00875f1.pdf]

## Supplementary Material

A microwave-activated coal fly ash catalyst for oxidative elimination of  
organic pollutants in Fenton-like process

Nannan Wang<sup>a,b,\*</sup>, Han Xu<sup>a</sup>, Shuo Li<sup>c,\*\*</sup>

<sup>a</sup> Department of Environmental Engineering, Beijing Institute of Petrochemical  
Technology, Beijing 102617, PR China.

<sup>b</sup> Beijing Key Laboratory of Pipeline Critical Technology and Equipment for  
Deepwater Oil & Gas Development, Beijing 102617, PR China.

<sup>c</sup> College of Chemistry and Chemical Engineering, Qiqihar University, Qiqihar,  
161006, PR China.

---

Corresponding authors:

\* Nannan Wang: E-mail: [wnn\\_flying@163.com](mailto:wnn_flying@163.com); Tel.: 0086-13704517275

\*\* Shuo Li: E-mail: [shuo\\_105@163.com](mailto:shuo_105@163.com)

Table S1 Orthogonal test of the activation of CFA<sub>R</sub> by MW irradiation

| No.                    | Factor 1, i=1<br>Power of MW (W) | Factor 2, i=2<br>Irradiation time (min) | Factor 3, i=3<br>Mixing speed (rpm) | Factor 4, i=4<br>Loading of CFA <sub>R</sub> (g L <sup>-1</sup> ) | Removal rate of TOC (%) |
|------------------------|----------------------------------|-----------------------------------------|-------------------------------------|-------------------------------------------------------------------|-------------------------|
| 1                      | 100 <sub>j=1</sub>               | 10 <sub>j=1</sub>                       | 0 <sub>j=1</sub>                    | 1 <sub>j=1</sub>                                                  | 21.3                    |
| 2                      | 100                              | 20 <sub>j=2</sub>                       | 40 <sub>j=2</sub>                   | 5 <sub>j=2</sub>                                                  | 26.5                    |
| 3                      | 100                              | 30 <sub>j=3</sub>                       | 80 <sub>j=3</sub>                   | 10 <sub>j=3</sub>                                                 | 30.7                    |
| 4                      | 100                              | 40 <sub>j=4</sub>                       | 120 <sub>j=4</sub>                  | 20 <sub>j=4</sub>                                                 | 32.9                    |
| 5                      | 100                              | 50 <sub>j=5</sub>                       | 160 <sub>j=5</sub>                  | 30 <sub>j=5</sub>                                                 | 32.1                    |
| 6                      | 300 <sub>j=2</sub>               | 10                                      | 40                                  | 10                                                                | 41.5                    |
| 7                      | 300                              | 20                                      | 80                                  | 20                                                                | 44.6                    |
| 8                      | 300                              | 30                                      | 120                                 | 30                                                                | 43.1                    |
| 9                      | 300                              | 40                                      | 160                                 | 1                                                                 | 10.1                    |
| 10                     | 300                              | 50                                      | 0                                   | 5                                                                 | 25.9                    |
| 11                     | 500 <sub>j=3</sub>               | 10                                      | 80                                  | 30                                                                | 33.8                    |
| 12                     | 500                              | 20                                      | 120                                 | 1                                                                 | 15.5                    |
| 13                     | 500                              | 30                                      | 160                                 | 5                                                                 | 16.8                    |
| 14                     | 500                              | 40                                      | 0                                   | 10                                                                | 17                      |
| 15                     | 500                              | 50                                      | 40                                  | 20                                                                | 46.8                    |
| 16                     | 700 <sub>j=4</sub>               | 10                                      | 120                                 | 5                                                                 | 50.4                    |
| 17                     | 700                              | 20                                      | 160                                 | 10                                                                | 62.5                    |
| 18                     | 700                              | 30                                      | 0                                   | 20                                                                | 35.6                    |
| 19                     | 700                              | 40                                      | 40                                  | 30                                                                | 38.7                    |
| 20                     | 700                              | 50                                      | 80                                  | 1                                                                 | 13.6                    |
| 21                     | 1000 <sub>j=5</sub>              | 10                                      | 160                                 | 20                                                                | 49.7                    |
| 22                     | 1000                             | 20                                      | 0                                   | 30                                                                | 35.9                    |
| 23                     | 1000                             | 30                                      | 40                                  | 1                                                                 | 12.7                    |
| 24                     | 1000                             | 40                                      | 80                                  | 5                                                                 | 39.7                    |
| 25                     | 1000                             | 50                                      | 120                                 | 10                                                                | 43.1                    |
| <i>I</i> <sub>11</sub> | 28.7                             | 39.3                                    | 27.1                                | 14.6                                                              |                         |
| <i>I</i> <sub>12</sub> | 33.0                             | 37.0                                    | 33.2                                | 31.9                                                              |                         |
| <i>I</i> <sub>13</sub> | 26.0                             | 27.8                                    | 32.5                                | 39.0                                                              |                         |
| <i>I</i> <sub>14</sub> | 40.2                             | 27.7                                    | 37.0                                | 41.9                                                              |                         |
| <i>I</i> <sub>15</sub> | 36.2                             | 32.3                                    | 34.2                                | 36.7                                                              |                         |
| <i>R</i> <sub>E</sub>  | 14.2                             | 11.7                                    | 9.9                                 | 27.3                                                              |                         |

Table S2 Significant oxide components in CFA<sub>R</sub> and CFA<sub>MW</sub> (wt%).

|                   | SiO <sub>2</sub> | Al <sub>2</sub> O <sub>3</sub> | Fe <sub>2</sub> O <sub>3</sub> | TiO <sub>2</sub> | Cr <sub>2</sub> O <sub>3</sub> | MnO    | NiO    | CuO    | Nb <sub>2</sub> O <sub>5</sub> | CaO  | K <sub>2</sub> O | MgO   | Na <sub>2</sub> O |
|-------------------|------------------|--------------------------------|--------------------------------|------------------|--------------------------------|--------|--------|--------|--------------------------------|------|------------------|-------|-------------------|
| CFA <sub>R</sub>  | 56.16            | 24.75                          | 6.10                           | 1.41             | 0.0200                         | 0.0821 | 0.0066 | 0.0074 | 0.0021                         | 4.81 | 2.53             | 0.706 | 0.261             |
| CFA <sub>MW</sub> | 56.08            | 24.96                          | 6.35                           | 1.52             | 0.0225                         | 0.0865 | 0.0068 | 0.0069 | 0.0022                         | 4.68 | 2.67             | 0.559 | 0.244             |

Table S3 Performance comparison of Fenton-like catalysts prepared in different works

| No. | Catalyst                                                           | Preparation conditions <sup>a</sup> | Run time / removal rate of index                               | Target pollutant             | Ref.   |
|-----|--------------------------------------------------------------------|-------------------------------------|----------------------------------------------------------------|------------------------------|--------|
| 1   | CFA <sub>MW</sub>                                                  | Single-step microwave irradiation   | 3 / >60% <sub>TOC</sub>                                        | polyacrylamide               | herein |
| 2   | HpOFe-GAC                                                          | Multi-step preparation              | 5 / >78% <sub>color</sub>                                      | Acid Red 88                  | [1]    |
| 4   | 4%Fe/sulfonated-ZrO <sub>2</sub>                                   | Multi-step preparation              | 4 / >55% <sub>TOC</sub>                                        | clofibric acid               | [2]    |
| 5   | Fe@MesoC                                                           | Multi-step preparation              | 3 / >18% <sub>TOC</sub>                                        | sulfamethoxazole             | [3]    |
| 6   | Fe <sub>3</sub> O <sub>4</sub> /ZrO <sub>2</sub>                   | Multi-step preparation              | 5 / >61% <sub>3,4-dichlorobenzotrifluoride</sub>               | 3,4-dichlorobenzotrifluoride | [4]    |
| 7   | PAC@Fe <sup>II</sup> Fe <sub>2</sub> <sup>III</sup> O <sub>4</sub> | Multi-step preparation              | 5 / >70.4 <sub>aniline</sub> and >99% <sub>benzotriazole</sub> | aniline / benzotriazole      | [5]    |

Note: <sup>a</sup> means detailed information is not given due to space limitation. Readers can obtain the specific preparation steps from the corresponding literature.

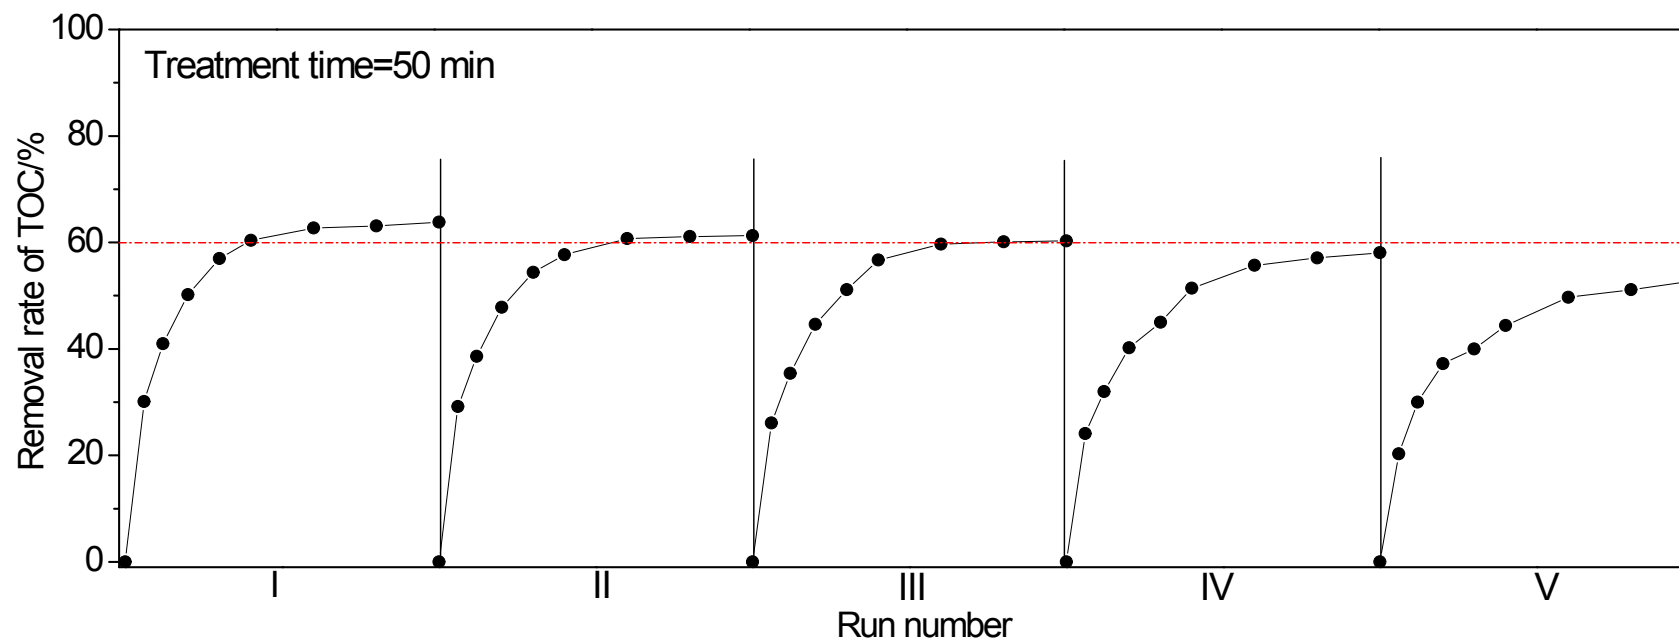

Fig. S1 Stability of CFA<sub>MW</sub> in the treatment of PAM wastewater.  
(H<sub>2</sub>O<sub>2</sub> dosage=12 mg L<sup>-1</sup>, CFA<sub>MW</sub> loading=10 g L<sup>-1</sup>, [PAM]= 200 mg L<sup>-1</sup>, T=303 K, pH=3)

## References

- [1] Rijuta Ganesh Saratale, Silojah Sivapathan, Ganesh Dattatraya Saratale, J. Rajesh Banu, Dong-Su Kim. Hydroxamic acid mediated heterogeneous Fenton-like catalysts for the efficient removal of Acid Red 88, textile wastewater and their phytotoxicity studies. *Ecotoxicol. Environ. Saf.* 167 (2019) 385-395.
- [2] Shailesh S. Sable, Sri Chandana Panchangam, Shang-Lien Lo. Abatement of clofibric acid by Fenton-like process using iron oxide supported sulfonated-ZrO<sub>2</sub>: Efficient heterogeneous catalysts. *J. Water Process Eng.* 26 (2018) 92-99.
- [3] Juntao Tang, Jianlong Wang. Fenton-like degradation of sulfamethoxazole using Fe-based magnetic nanoparticles embedded into mesoporous carbon hybrid as an efficient catalyst. *Chem. Eng. J.* 351 (2018) 1085-1094.
- [4] Hai Chen, Zhengnan Sun, Zhilin Yang, Zhonglei Zhang, Jianlong Wang, Mingbao Feng, Qi Yang. Degradation of 3,4-dichlorobenzotrifluoride by the Fenton-like process using zirconia-coated magnetite magnetic nanoparticles as an effective heterogeneous catalyst. *Environ. Sci. Pollut. Res.* 24 (2017) 18575-18584.
- [5] Mehdi Ahmadi, Babak Kakavandi, Sahand Jorfi, Minoos Azizi. Oxidative degradation of aniline and benzotriazole over PAC@Fe<sup>II</sup>Fe<sub>2</sub><sup>III</sup>O<sub>4</sub>: A recyclable catalyst in a heterogeneous photo-Fenton-like system. *J. Photochem. Photobiol., A* 336 (2017) 42-53
